# Supplementary material
Source: PubMed Central journal article supplement (PMC5757440)
Supplement: JCB694904_supplementary_fig1.pdf [file JCB694904_supplementary_fig1.pdf]

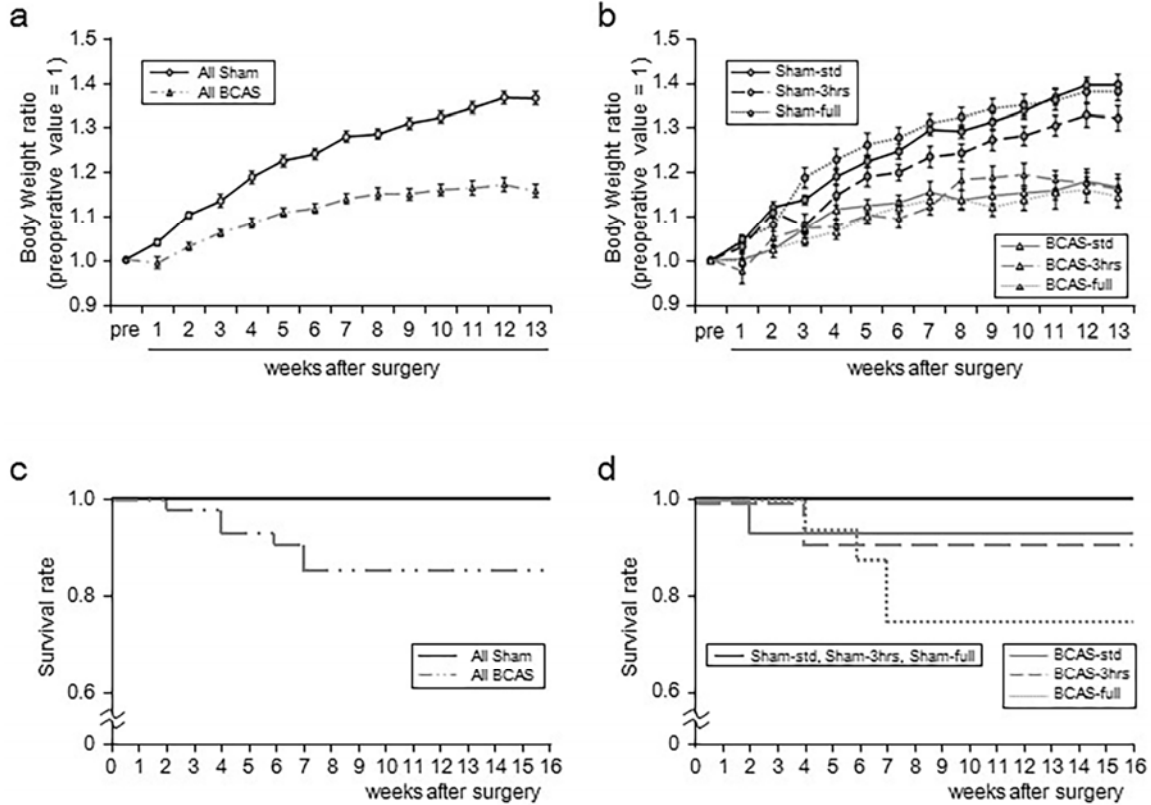

**Supplementary Figure 1. Body weight change (a–b) and survival rate (c–d) during experimental period** a, Body weight (BW) change of all sham and BCAS operated mice and b, BW change of sham subgroups and BCAS subgroups at indicated time points. BW was expressed as a ratio to the initial BW. BCAS operated mice showed delayed and less recovery of their BW after surgery compared with sham operated mice ( $P < 0.01$ ). c, Survival curves show survival rate of all sham (top) and all BCAS (bottom) operated mice. All sham-operated mice survived until 16 weeks after surgery. BCAS-operated mice survived less, whereas all sham-operated mice survived over 16 weeks period after surgery (Kaplan-Meier survival analysis, log-rank  $P < 0.01$ ). d, Survival curves show survival rate of all BCAS subgroups after surgery. BCAS-full group showed the highest mortality rate between BCAS subgroups.

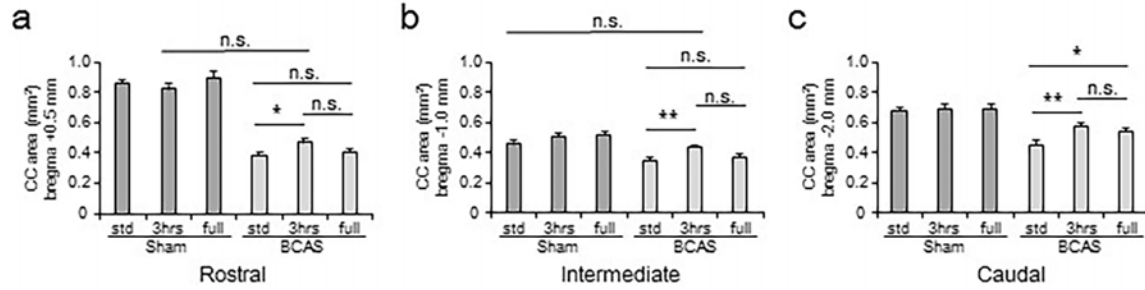

**Supplementary Figure 2. Area of the corpus callosum (CC) A-C, Histograms showing CC area of different coronal levels from rostral side (a), intermediate (b) to caudal level (c). All BCAS subgroups showed significantly smaller CC area compared to all sham subgroups ( $P < 0.01$ ) (a-c). BCAS-3hrs showed larger CC area compared with BCAS-std ( $*P < 0.05$ , (a);  $*P < 0.01$ , (b and c)). No difference was seen between BCAS-3hrs and BCAS-full (a, b and c). Only in the most caudal side, BCAS-std showed smaller CC area compared to BCAS-full (c). In rostral side, no difference was seen between BCAS-3hrs and sham-3hrs (a) as well as between BCAS-3hrs and sham-std (b). No difference was seen between sham subgroups (a, b and c).**
